# Supplementary material for: Validation of the King’s Brief Interstitial Lung Disease questionnaire in Idiopathic Pulmonary Fibrosis
Source: Springer Nature journal article supplement (doi:10.1186/s12890-019-1018-0), 2019-12-01
Supplement: MOESM5 [file 17641544]

**Additional file 5: Known groups validity**

| Clinical variable | <i>n</i> | Mean K-BILD total score (SD) | Mean difference (95% CI) | p-value | ES   |
|-------------------|----------|------------------------------|--------------------------|---------|------|
| <b>FVC</b>        |          |                              |                          |         |      |
| Lowest quartile   | 37       | 52.4 (11.1)                  | 8.6 (3.5 to 13.8)        | 0.001   | 0.13 |
| Highest quartile  | 40       | 61.0 (11.3)                  |                          |         |      |
| <b>DLCO</b>       |          |                              |                          |         |      |
| Lowest quartile   | 36       | 52.1 (9.3)                   | 13.7*                    | <0.0001 | 0.25 |
| Highest quartile  | 37       | 65.8 (2.3)                   |                          |         |      |
| <b>6MWD</b>       |          |                              |                          |         |      |
| Lowest quartile   | 35       | 51.7 (12.2)                  | 11.3 (5.8 to 16.7)       | 0.0001  | 0.20 |
| Highest quartile  | 36       | 62.9 (10.9)                  |                          |         |      |
| <b>LTOT</b>       |          |                              |                          |         |      |
| No LTOT           | 130      | 59.3 (12.7)                  | 7.5*                     | 0.002   | 0.04 |
| Receiving LTOT    | 19       | 51.7 (7.7)                   |                          |         |      |
| <b>GAP index</b>  |          |                              |                          |         |      |
| 1                 | 56       | 62.8 (14.5)                  |                          | 0.0001  | 0.13 |
| 2                 | 76       | 57.2 (8.9)                   |                          |         |      |
| 3                 | 17       | 48.4 (12.3)                  |                          |         |      |

\*: No 95% CI due to the use of a non-parametric test. *K-BILD*: King's Brief Interstitial Lung Disease questionnaire; *95% CI*: 95% confidence intervals; *ES*: Effect size (partial  $\eta^2$ ); *FVC*: Forced vital capacity; *DLCO*: diffusion capacity of the lung for carbon monoxide; *6MWD*: Distance walked during the 6-minute walk test; *LTOT*: Long-term oxygen therapy; *GAP*: Gender, age, physiology
