# Supplementary material for: Validation of the King’s Brief Interstitial Lung Disease questionnaire in Idiopathic Pulmonary Fibrosis
Source: BMC Pulm Med. 2019 Dec 19;19:255. doi: 10.1186/s12890-019-1018-0 (PMC6924069; doi:10.1186/s12890-019-1018-0)
Supplement: Supplementary file 4 — Additional file 4. Missing data analyses. [file 12890_2019_1018_MOESM4_ESM.pdf]

#### Additional file 4: Missing data analyses

At baseline

|                                                     | Responders<br>( <i>n</i> = 145) | Non-responders<br>( <i>n</i> = 5) | Difference<br>(95% CI) | p-value |
|-----------------------------------------------------|---------------------------------|-----------------------------------|------------------------|---------|
| <b>Gender</b>                                       |                                 |                                   |                        |         |
| Male, <i>n</i>                                      | 118                             | 4                                 |                        | 1.00    |
| Female, <i>n</i>                                    | 27                              | 1                                 |                        |         |
| <b>Age</b> , years, mean ± SD                       | 72.9 ± 6.3                      | 73.4 ± 3.4                        | -0.5 (-6.1 to 5.1)     | 0.86    |
| <b>Time since diagnosis</b> , years, median (range) | 0.5 (0.0 to 9.3)                | 0.0 (0.0 to 3.3)                  |                        | 0.26    |
| <b>Smoking status</b>                               |                                 |                                   |                        |         |
| Current, <i>n</i>                                   | 8                               | 2                                 |                        | 0.12    |
| Former, <i>n</i>                                    | 99                              | 1                                 |                        |         |
| Never, <i>n</i>                                     | 38                              | 2                                 |                        |         |
| <b>Long-term oxygen therapy</b>                     |                                 |                                   |                        |         |
| No, <i>n</i>                                        | 126                             | 5                                 |                        | 1.00    |
| Yes, <i>n</i>                                       | 19                              | 0                                 |                        |         |
| <b>Medical treatment for IPF</b>                    |                                 |                                   |                        |         |
| No, <i>n</i>                                        | 62                              | 3                                 |                        | 0.65    |
| Yes, <i>n</i>                                       | 83                              | 2                                 |                        |         |
| <b>FVC</b> , % predicted, mean ± SD                 | 87.2 ± 23.1                     | 88.1 ± 23.2                       | -1.0 (-21.8 to 19.8)   | 0.93    |
| <b>DLCO</b> , % predicted, mean ± SD                | 48.5 ± 14.2                     | 47.5 ± 10.7                       | 1.0 (-11.7 to 13.7)    | 0.88    |
| <b>6MWT distance</b> , m, mean ± SD                 | 450.2 ± 113.5                   | 455.3 ± 85.6                      | -5.0 (118.3 to 108.2)  | 0.93    |

Values are presented as *n*, mean  $\pm$  standard deviation (SD) or median with range(16). 95% CI: 95% confidence intervals; IPF: Idiopathic pulmonary fibrosis; FVC: Forced vital capacity; DLCO: diffusion capacity of the lung for carbon monoxide; 6MWT: 6-minute walk test

After 14 days

|                                                     | Responders<br>( <i>n</i> = 139) | Non-responders<br>( <i>n</i> = 11) | Difference<br>(95% CI) | p-value |
|-----------------------------------------------------|---------------------------------|------------------------------------|------------------------|---------|
| <b>Gender</b>                                       |                                 |                                    |                        |         |
| Male, <i>n</i>                                      | 113                             | 9                                  |                        | 1.00    |
| Female, <i>n</i>                                    | 26                              | 2                                  |                        |         |
| <b>Age</b> , years, mean ± SD                       | 72.7 ± 6.2                      | 74.9 ± 7.0                         | -2.2 (-6.0 to 1.7)     | 0.27    |
| <b>Time since diagnosis</b> , years, median (range) | 0.5 (0.0 to 9.3)                | 0.1 (0.0 to 3.3)                   |                        | 0.38    |
| <b>Smoking status</b>                               |                                 |                                    |                        |         |
| Current, <i>n</i>                                   | 7                               | 4                                  |                        | 0.09    |
| Former, <i>n</i>                                    | 96                              | 2                                  |                        |         |
| Never, <i>n</i>                                     | 36                              | 5                                  |                        |         |
| <b>Long-term oxygen therapy</b>                     |                                 |                                    |                        |         |
| No, <i>n</i>                                        | 121                             | 10                                 |                        | 1.00    |
| Yes, <i>n</i>                                       | 18                              | 1                                  |                        |         |
| <b>Medical treatment for IPF</b>                    |                                 |                                    |                        |         |
| No, <i>n</i>                                        | 60                              | 5                                  |                        | 1.00    |
| Yes, <i>n</i>                                       | 79                              | 6                                  |                        |         |
| <b>FVC</b> , % predicted, mean ± SD                 | 87.2 ± 23.0                     | 87.4 ± 24.5                        | -0.2 (-14.6 to 14.1)   | 0.97    |
| <b>DLCO</b> , % predicted, mean ± SD                | 48.6 ± 14.2                     | 46.7 ± 12.7                        | 1.8 (-6.9 to 10.6)     | 0.68    |
| <b>6MWT distance</b> , m, mean ± SD                 | 458.4 ± 107.9                   | 355.5 ± 128.0                      | 102.9 (35.0 to 170.9)  | 0.003*  |

Values are presented as *n*, mean ± standard deviation (SD) or median with range. \*  $p < 0.05$ . 95% CI: 95% confidence intervals; IPF: Idiopathic pulmonary fibrosis; FVC: Forced vital capacity; DLCO: diffusion capacity of the lung for carbon monoxide; 6MWT: 6-minute walk test
